# Supplementary material for: West Nile Virus in Brazil
Source: MDPI journal article supplement (doi:10.3390/pathogens10070896), 2021-07-15
Supplement: s1 [file s1]

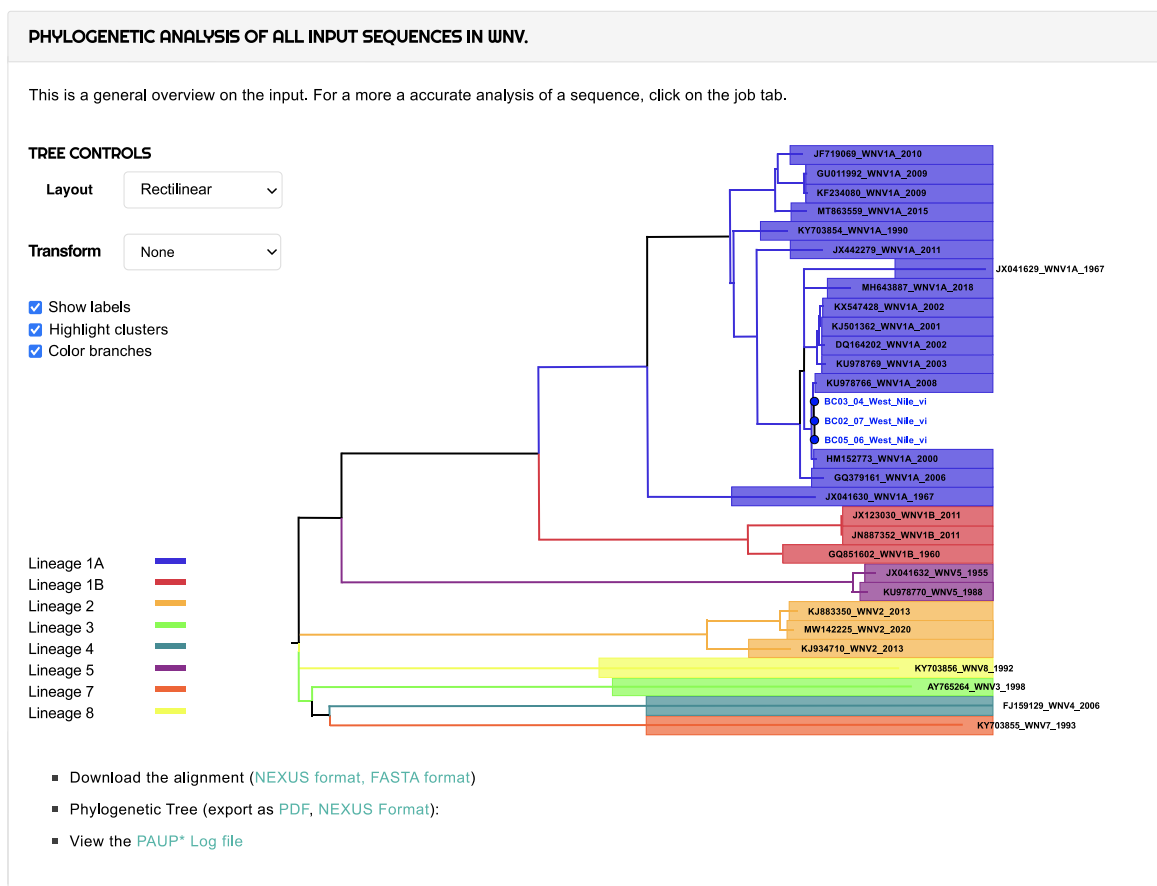

**Figure S1.** WNV typing tool.

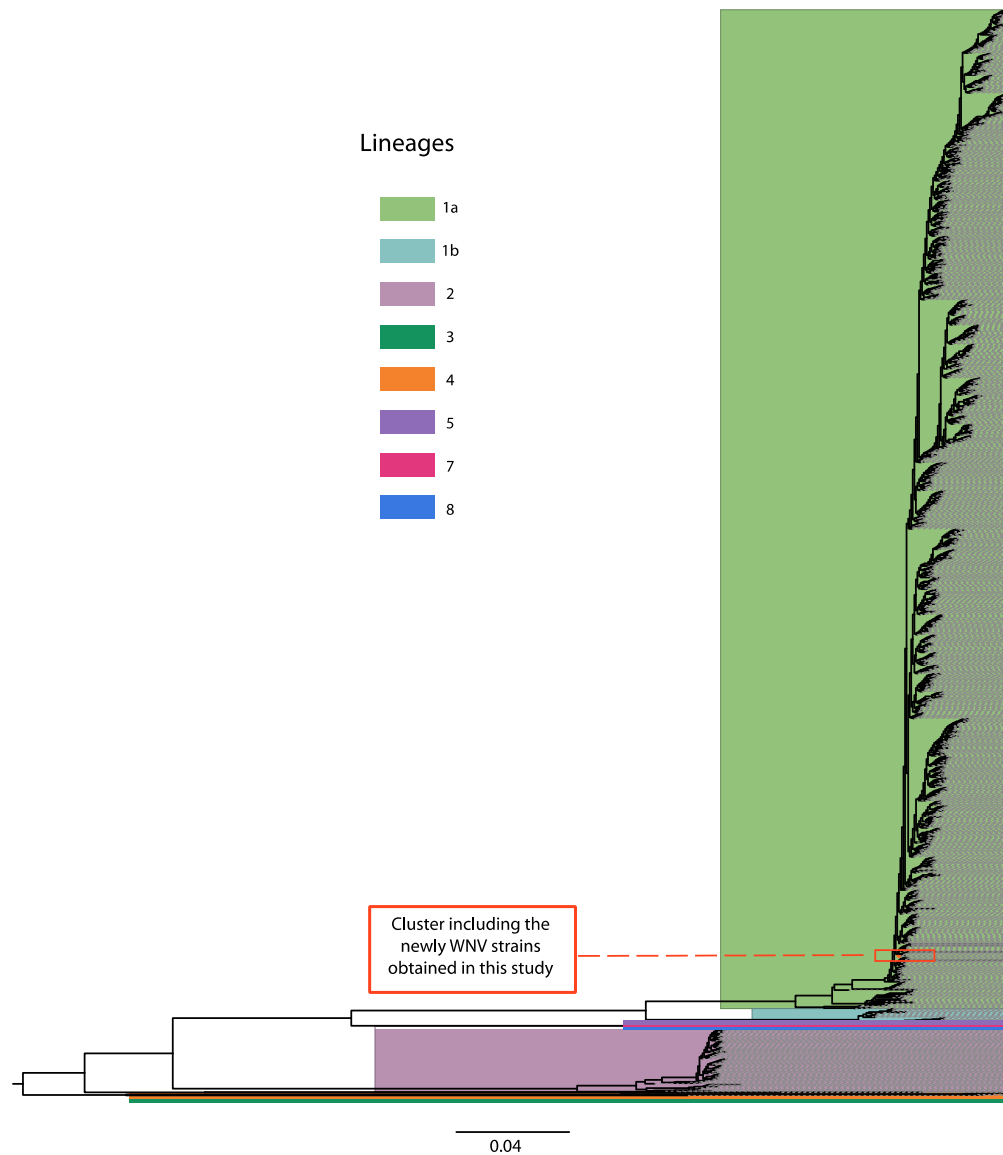

**Figure S2.** Maximum likelihood phylogenetic tree of 2321 WNV complete genomes. Colours indicates different lineages. Highlighted red clade include the WNV viral strain obtained in this study.

**Table S1.** Primer scheme.

| Primer Name     | Sequence                   |
|-----------------|----------------------------|
| WNVL1a_1_LEFT   | GCCTGTGTGAGCTGACAAACTT     |
| WNVL1a_1_RIGHT  | TTTGTTTTGAGCTCCGCCGATT     |
| WNVL1a_2_LEFT   | GGATCGGTGGAGAGGTGTGAAT     |
| WNVL1a_2_RIGHT  | GACTTTGTGCACCAACAGTCGA     |
| WNVL1a_3_LEFT   | TGTCAGAGCAATGGATGTGGGA     |
| WNVL1a_3_RIGHT  | CTGTTGCTCATTCCAAGGCAGT     |
| WNVL1a_4_LEFT   | GTCATTGGTTGGATGCTTGGGA     |
| WNVL1a_4_RIGHT  | TGTGTCAATGCTTCCTTGCCA      |
| WNVL1a_5_LEFT   | AATGACAAACGTGCTGACCCAG     |
| WNVL1a_5_RIGHT  | CACTCACGATGGACCAAGAACG     |
| WNVL1a_6_LEFT   | GGAGAATATGGAGAAGTGACAGTGG  |
| WNVL1a_6_RIGHT  | AAAGCCTTTGAACAGACGCCAT     |
| WNVL1a_7_LEFT   | TTCAAGCAACACTGTCAAGTTGAC   |
| WNVL1a_7_RIGHT  | TTTCCAATGCTGCTTCCAGAC      |
| WNVL1a_8_LEFT   | CCTGATTGAATTGGAACACCCT     |
| WNVL1a_8_RIGHT  | ACGGAGAGGAAGAGCAGAACTC     |
| WNVL1a_9_LEFT   | GCATGTCCTGGATAACGCAAGG     |
| WNVL1a_9_RIGHT  | AACCACGACACTAAGGTCCACA     |
| WNVL1a_10_LEFT  | TCTACGATCAGTTTCCAGACTGGA   |
| WNVL1a_10_RIGHT | GTTGTTCTTGACAGCCGTTCCA     |
| WNVL1a_11_LEFT  | AGTGGAGGATTTTGGATTTGGTCT   |
| WNVL1a_11_RIGHT | AGTCAATCTCTACCCGGCCTTC     |
| WNVL1a_12_LEFT  | GGCGATGGAATCCTTGAGAGTG     |
| WNVL1a_12_RIGHT | GGCCCAACTGAAAAGGGTCAAT     |
| WNVL1a_13_LEFT  | CGGCTGTTGGTATGGTATGGAG     |
| WNVL1a_13_RIGHT | GAAAACAGCCGCCAACATCAAC     |
| WNVL1a_14_LEFT  | GGCGACCTTCAAGATACAACCA     |
| WNVL1a_14_RIGHT | GCTAGAGCCAAGCATAGCAGAC     |
| WNVL1a_15_LEFT  | GGATACTGCTGTTGATGGTCGG     |
| WNVL1a_15_RIGHT | TCATCAAGCCGCACATCAACTC     |
| WNVL1a_16_LEFT  | TTCTGGGAAATCAACAGATATGTGGA |
| WNVL1a_16_RIGHT | TCAAAGCGGCTCCTTTTGTGT      |
| WNVL1a_17_LEFT  | TCTACAGGATCATGACTCGCGG     |
| WNVL1a_17_RIGHT | CGCTTATGTATGAGCCGTTGGG     |
| WNVL1a_18_LEFT  | GACTTTGGACTTCCCCACTGGA     |
| WNVL1a_18_RIGHT | ATTATGTTCTCTGGGCACTGCG     |
| WNVL1a_19_LEFT  | ACAGAAGACTGAGAACAGCCGT     |
| WNVL1a_19_RIGHT | TCCAGAGTCCAAGCTCGATCC      |
| WNVL1a_20_LEFT  | TATTCATGACAGCCACCCCACC     |
| WNVL1a_20_RIGHT | GCTGTCACCTGCAGATGGTTCTC    |

|                 |                          |
|-----------------|--------------------------|
| WNVL1a_21_LEFT  | CTAACTTCAAGGCGAGCAGGGT   |
| WNVL1a_21_RIGHT | TGCAGTCCTCAACAGTTCCAGA   |
| WNVL1a_22_LEFT  | TCTACCAACCAGAGCGTGAGAA   |
| WNVL1a_22_RIGHT | CCCAGAACCTCAATGAGCCCTA   |
| WNVL1a_23_LEFT  | GAAAGGAAGATTCTGAGGCCGC   |
| WNVL1a_23_RIGHT | CGTTCCTGGAACCTCAGCCATC   |
| WNVL1a_24_LEFT  | GTATTCTTCCTCCTCATGCAGCG  |
| WNVL1a_24_RIGHT | CGGCCTCAAGTCCAGAAGAAAC   |
| WNVL1a_25_LEFT  | GTTGGCTGGACAAGACCAAGAG   |
| WNVL1a_25_RIGHT | GGAACCATGTAGGCATAGTGGC   |
| WNVL1a_26_LEFT  | CTTCGTCGATGTTGGAGTGTCTG  |
| WNVL1a_26_RIGHT | CTCCATTCTCCCAAAGCGTCAC   |
| WNVL1a_27_LEFT  | GCTGATCTTAGTGTCTCTAGCTGC |
| WNVL1a_27_RIGHT | CAGTTTGTCTGTGCCCCTAGAG   |
| WNVL1a_28_LEFT  | GTACCGCAAAGAGGCCATCATC   |
| WNVL1a_28_RIGHT | TTGACGAGGACTCTCCGATGTC   |
| WNVL1a_29_LEFT  | TGGAACATTGTCACCATGAAGAGT |
| WNVL1a_29_RIGHT | CTCCTCGTATTGGGGTCCCTT    |
| WNVL1a_30_LEFT  | GAGTCGAGCTTCAGGCAATGTG   |
| WNVL1a_30_RIGHT | AGGGAGTAGTGTCAAGTCATGGC  |
| WNVL1a_31_LEFT  | ACGGCAGTTATGATGTGAAGCC   |
| WNVL1a_31_RIGHT | CTCCTCATCCACCATCTCCCAA   |
| WNVL1a_32_LEFT  | GTCAACAGCAATGCAGCTTTGG   |
| WNVL1a_32_RIGHT | GCCAACTTCACGCAGGATGTAA   |
| WNVL1a_33_LEFT  | TCGAGGCTCTGGGTTTTCTCAA   |
| WNVL1a_33_RIGHT | TTCCCCTTCCATCATCCTCACC   |
| WNVL1a_34_LEFT  | TCCAGAGAAGATCAGAGGGGGA   |
| WNVL1a_34_RIGHT | TGGAACCACCAGTGTCTTCCA    |
| WNVL1a_35_LEFT  | AGAGTGGAACCGTCAACTGGA    |
| WNVL1a_35_RIGHT | CCAGACCTCCAACATGTCCTCT   |
| WNVL1a_36_LEFT  | GTGGCTGCTTCTGTACTTCCAC   |
| WNVL1a_36_RIGHT | TCTACAGTACTGTGTCCTCAACCA |
| WNVL1a_37_LEFT  | GTGGCTATCAACCAAGTCAGAGC  |
| WNVL1a_37_RIGHT | CAACATGTGGGGTCCTTCTTCC   |
| WNVL1a_38_LEFT  | GAAGTTGAGTAGACGGTGCTGC   |
| WNVL1a_38_RIGHT | ACGGGGTCTCCACTAACCTCTA   |

**Table S2.** WNV suspected cases reported between 2014-2020 in each Brazilian state, according to SINAN.

| States | 2014 | 2015 | 2016 | 2017 | 2018 | 2019 | 2020 |
|--------|------|------|------|------|------|------|------|
| AC     | 0    | 0    | 0    | 2    | 0    | 0    | 0    |
| AL     | 2    | 0    | 0    | 0    | 0    | 0    | 0    |
| AM     | 1    | 2    | 0    | 0    | 0    | 0    | 0    |
| AP     | 0    | 0    | 0    | 0    | 0    | 0    | 0    |
| BA     | 0    | 0    | 0    | 0    | 0    | 0    | 0    |
| CE     | 0    | 0    | 0    | 0    | 0    | 1    | 1    |
| DF     | 0    | 0    | 0    | 1    | 0    | 0    | 0    |
| ES     | 0    | 0    | 0    | 1    | 49   | 13   | 0    |
| GO     | 0    | 0    | 0    | 0    | 1    | 2    | 0    |
| MA     | 0    | 1    | 0    | 0    | 1    | 1    | 0    |
| MG     | 2    | 0    | 0    | 0    | 1    | 2    | 0    |
| MS     | 0    | 0    | 0    | 0    | 0    | 0    | 0    |
| MT     | 0    | 0    | 0    | 0    | 2    | 0    | 0    |
| PA     | 0    | 1    | 0    | 0    | 1    | 0    | 0    |
| PB     | 0    | 0    | 0    | 0    | 0    | 0    | 0    |
| PE     | 0    | 0    | 0    | 0    | 0    | 2    | 0    |
| PI     | 10   | 118  | 76   | 2    | 3    | 18   | 5    |
| PR     | 0    | 1    | 0    | 1    | 0    | 1    | 0    |
| RJ     | 0    | 0    | 0    | 0    | 0    | 0    | 0    |
| RN     | 1    | 0    | 0    | 1    | 4    | 1    | 0    |
| RO     | 0    | 0    | 0    | 0    | 0    | 0    | 0    |
| RR     | 0    | 1    | 1    | 0    | 2    | 0    | 0    |
| RS     | 0    | 0    | 2    | 0    | 0    | 0    | 0    |
| SC     | 0    | 0    | 0    | 1    | 0    | 0    | 0    |
| SE     | 0    | 0    | 0    | 0    | 0    | 0    | 0    |
| SP     | 2    | 5    | 0    | 3    | 8    | 6    | 0    |
| TO     | 0    | 0    | 0    | 0    | 2    | 0    | 0    |

**Table S3.** Globally reference WNV sequences from the subset n=29 used in this study.

| <b>Acession Number</b> | <b>Collection date</b> | <b>Country</b> | <b>Lineage</b> | <b>Host</b> |
|------------------------|------------------------|----------------|----------------|-------------|
| MN849176               | 01/09/2019             | USA            | 1a             | Mosquito    |
| JF719069               | 01/08/2010             | Spain          | 1a             | Horse       |
| KY703854               | 01/01/1990             | Senegal        | 1a             | Mosquito    |
| GU011992               | 01/01/2009             | Italy          | 1a             | Human       |
| KF234080               | 01/01/2009             | Italy          | 1a             | Human       |
| MT863559               | 10/03/2015             | France         | 1a             | Horse       |
| JX442279               | 01/01/2011             | China          | 1a             | Mosquito    |
| JX041629               | 01/01/1967             | Azerbaijan     | 1a             | Bird        |
| JX041630               | 01/01/1967             | Azerbaijan     | 1a             | Bird        |
| KX547428               | 26/09/2002             | USA            | 1a             | Mosquito    |
| KJ501362               | 01/01/2001             | USA            | 1a             | Crow        |
| DQ164202               | 01/01/2002             | USA            | 1a             | Human       |
| MH643887               | 26/04/2018             | Brazil         | 1a             | Horse       |
| KU978769               | 30/05/2003             | Mexico         | 1a             | Crow        |
| KU978766               | 01/07/2009             | Colombia       | 1a             | Flamingo    |
| GQ379161               | 01/02/2006             | Argentina      | 1a             | Horse       |
| HM152773               | 01/01/2000             | Israel         | 1a             | Human       |
| JX123030               | 03/07/2011             | Australia      | 1b             | Horse       |
| GQ851602               | 01/01/1960             | Australia      | 1b             | Mosquito    |
| JN887352               | 01/01/2011             | Australia      | 1b             | Horse       |
| KJ883350               | 05/07/1905             | Greece         | 2              | Human       |
| KJ934710               | 27/08/2013             | Romania        | 2              | Tick        |
| MW142225               | 01/08/2020             | Germany        | 2              | Human       |
| AY765264               | 01/01/1998             | Czech Republic | 3              | Mosquito    |
| FJ159129               | 01/01/2006             | Russia         | 4              | Mosquito    |
| JX041632               | 01/01/1955             | india          | 5              | Mosquito    |
| KU978770               | 02/12/1988             | india          | 5              | Human       |
| KY703855               | 01/01/1993             | Senegal        | 7              | Tick        |
| KY703856               | 01/01/1992             | Senegal        | 8              | Mosquito    |
